# Supplementary material for: Applying modern psychometric techniques to melodic discrimination testing: Item response theory, computerised adaptive testing, and automatic item generation
Source: PubMed Central journal article supplement (PMC5472621; doi:10.1038/s41598-017-03586-z), 2017-06-15
Supplement: 41598_2017_3586_MOESM1_ESM.pdf [file 41598_2017_3586_MOESM1_ESM.pdf]

**Applying modern psychometric techniques to melodic discrimination testing: Item response theory, computerised adaptive testing, and automatic item generation**

**Supplementary figures**

Peter M. C. Harrison<sup>1,2,\*</sup>, Tom Collins<sup>3,4</sup>, and Daniel Müllensiefen<sup>2</sup>

<sup>1</sup>Queen Mary University of London, School of Electronic Engineering and Computer Science,  
London, E1 4NS, England

<sup>2</sup>Goldsmiths, University of London, Department of Psychology, London, SE14 6NW, England

<sup>3</sup>Lehigh University, Department of Psychology, Bethlehem, PA 18015, USA

<sup>4</sup>Music Artificial Intelligence Algorithms, Inc., Davis, CA 95617, USA

\*[p.m.c.harrison@qmul.ac.uk](mailto:p.m.c.harrison@qmul.ac.uk)

## Example items

This section contains four example items from the item bank for Version 2 of the melodic discrimination test. The item families are chosen to illustrate the range of melody lengths available, as well as illustrating contour violations and tonality violations.

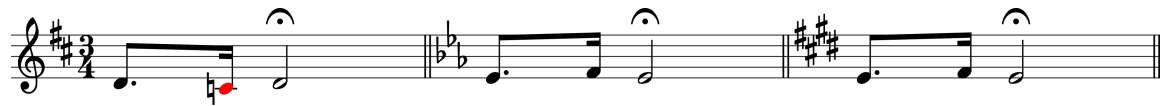

Supplementary Figure S1. *Example item with a length of three notes, contour violated, and tonality violated. The first melody is the odd-one-out, and the altered note is highlighted. This item has an estimated difficulty of  $-0.991$ .*

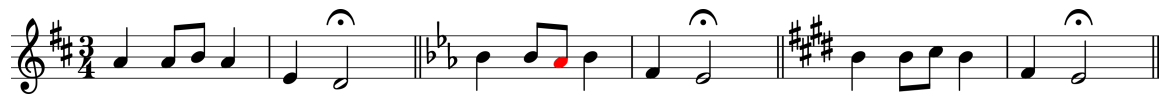

Supplementary Figure S2. *Example item with a length of six notes, contour violated, and tonality preserved. The second melody is the odd-one-out, and the altered note is highlighted. This item has an estimated difficulty of  $-0.197$ .*

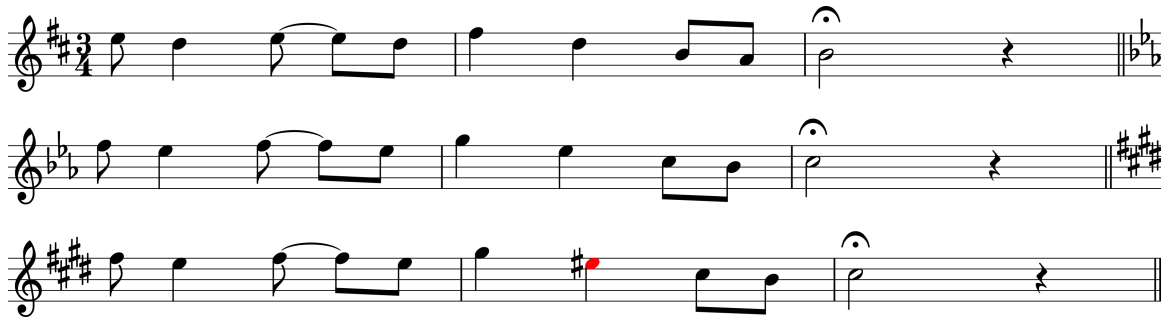

Supplementary Figure S3. *Example item with a length of nine notes, contour preserved, and tonality violated. The third melody is the odd-one-out, and the altered note is highlighted. This item has an estimated difficulty of 0.613.*

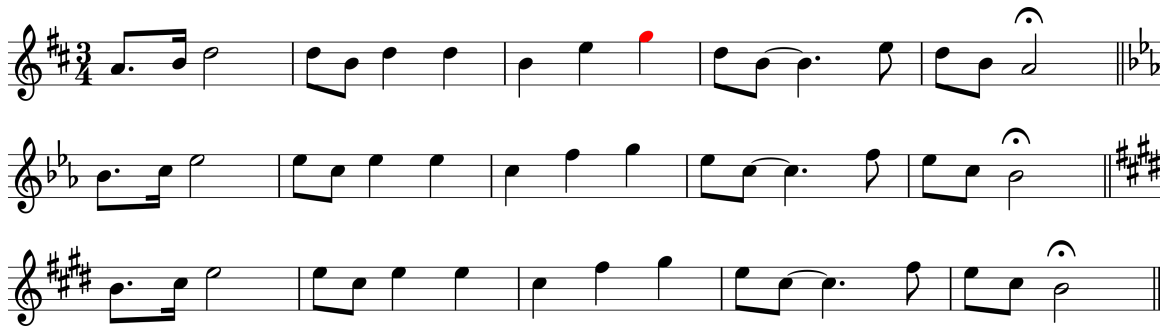

Supplementary Figure S4. *Example item with a length of sixteen notes, contour preserved, and tonality preserved. The first melody is the odd-one-out, and the altered note is highlighted. This item has an estimated difficulty of 1.844.*
